# Supplementary material for: UROPA: a tool for Universal RObust Peak Annotation
Source: PubMed Central journal article supplement (PMC5453960; doi:10.1038/s41598-017-02464-y), 2017-06-01
Supplement: 41598_2017_2464_MOESM1_ESM.pdf [file 41598_2017_2464_MOESM1_ESM.pdf]

## Additional Informations

UROPA: a tool for Universal **RO**bst **Pea**k **Ann**otation

Maria Kondili <sup>1#</sup>      maria.kondili@mpi-bn.mpg.de

Annika Fust <sup>1#</sup>      annika.fust@mpi-bn.mpg.de

Jens Preussner <sup>1</sup>      jens.preussner@mpi-bn.mpg.de

Carsten Kuenne <sup>1</sup>      carsten.kuenne@mpi-bn.mpg.de

Thomas Braun <sup>2\*</sup>      thomas.braun@mpi-bn.mpg.de

Mario Looso <sup>1\*</sup>      mario.looso@mpi-bn.mpg.de

<sup>1</sup>Max Planck Institute for Heart and Lung Research, Bioinformatics Core Unit (BCU),  
Ludwigstrasse 43, 61231 Bad Nauheim, Germany

<sup>2</sup>Max Planck Institute for Heart and Lung Research, Department of Cardiac Development and  
Remodeling, Ludwigstrasse 43, 61231 Bad Nauheim, Germany

\*Corresponding author

#Contributed equally

Additional File 1: Exemplary summary statistics and peak annotation result files generated by UROPA; The file represents the summary statistics as reported by UROPA for the configuration file shown on page one, followed by the detailed summary visualizations.

Details can be found in the manual: <http://uopa-anual.readthedocs.io/output.html#summary-visualisation>

```
{ "queries":[
  {"feature":"gene", "distance":5000, "feature.anchor":"start", "filter.attribute":"gene_type", "attribute.value":"protein_coding", "internals":"True", "show.attributes":["gene_name","gene_type"]},
  {"feature":"gene", "distance":10000, "feature.anchor":"start", "filter.attribute":"gene_type", "attribute.value":"protein_coding", "direction":"upstream"},
  {"feature":"transcript", "distance":1000, "feature.anchor":"start", "internals":"False"}],
"priority":"False",
"gtf": "gencode.v19.annotation.gtf",
"bed": "ENCF001VFA.peaks.bed" }
```

| peak_id | peak_chr | peak_start | peak_center | peak_end  | feature    | feat_start | feat_end  | feat_strand | feat_anchor | distance | genomic_location  | feat_ovl_peak | peak_ovl_feat | gene_name | gene_type      | query |
|---------|----------|------------|-------------|-----------|------------|------------|-----------|-------------|-------------|----------|-------------------|---------------|---------------|-----------|----------------|-------|
| peak_1  | chr21    | 26932550   | 26945254    | 26957959  | NA         | NA         | NA        | NA          | NA          | NA       | NA                | NA            | NA            | NA        | NA             | 0     |
| peak_1  | chr21    | 26932550   | 26945254    | 26957959  | NA         | NA         | NA        | NA          | NA          | NA       | NA                | NA            | NA            | NA        | NA             | 1     |
| peak_1  | chr21    | 26932550   | 26945254    | 26957959  | NA         | NA         | NA        | NA          | NA          | NA       | NA                | NA            | NA            | NA        | NA             | 2     |
| peak_16 | chr1     | 149856066  | 149858333   | 149860600 | gene       | 149856010  | 149858232 | -           | start       | 101      | overlapStart      | 0.48          | 0.98          | HIST2H2BE | protein_coding | 0     |
| peak_16 | chr1     | 149856066  | 149858333   | 149860600 | gene       | 149859019  | 149859466 | -           | start       | 1133     | FeatureInsidePeak | 0.1           | 1             | HIST2H2AB | protein_coding | 0     |
| peak_16 | chr1     | 149856066  | 149858333   | 149860600 | gene       | 149858525  | 149858961 | +           | start       | 192      | FeatureInsidePeak | 0.1           | 1             | HIST2H2AC | protein_coding | 0     |
| peak_16 | chr1     | 149856066  | 149858333   | 149860600 | gene       | 149859440  | 149872351 | +           | start       | 1107     | overlapStart      | 0.26          | 0.09          | BOLA1     | protein_coding | 0     |
| peak_16 | chr1     | 149856066  | 149858333   | 149860600 | gene       | 149859440  | 149872351 | +           | start       | 1107     | overlapStart      | 0.26          | 0.09          | BOLA1     | protein_coding | 1     |
| peak_16 | chr1     | 149856066  | 149858333   | 149860600 | transcript | 149858525  | 149858961 | +           | start       | 192      | FeatureInsidePeak | 0.1           | 1             | HIST2H2AC | protein_coding | 2     |
| peak_16 | chr1     | 149856066  | 149858333   | 149860600 | transcript | 149856010  | 149858232 | -           | start       | 101      | overlapStart      | 0.48          | 0.98          | HIST2H2BE | protein_coding | 2     |

Additional Table 1: Allhits output of UROPA annotation with config file as described above. Multiple hits for each query for each peak are included (see column query).

| peak_id | peak_chr | peak_start | peak_center | peak_end  | feature | feat_start | feat_end  | feat_strand | feat_anchor | distance | genomic_location | feat_ovl_peak | peak_ovl_feat | gene_name | gene_type      | query |
|---------|----------|------------|-------------|-----------|---------|------------|-----------|-------------|-------------|----------|------------------|---------------|---------------|-----------|----------------|-------|
| peak_1  | chr21    | 26932550   | 26945254    | 26957959  | NA      | NA         | NA        | NA          | NA          | NA       | NA               | NA            | NA            | NA        | NA             | 0,1,2 |
| peak_16 | chr1     | 149856066  | 149858333   | 149860600 | gene    | 149856010  | 149858232 | -           | start       | 101      | overlapStart     | 0.48          | 0.98          | HIST2H2BE | protein_coding | 0     |

Additional Table 2: Finalhits output of UROPA annotation with config file as described above. Only best hit for each peak is given (see column query).

| peak_id | peak_chr | peak_start | peak_center | peak_end  | feature    | feat_start | feat_end  | feat_strand | feat_anchor | distance | genomic_location | feat_ovl_peak | peak_ovl_feat | gene_name | gene_type      | query |
|---------|----------|------------|-------------|-----------|------------|------------|-----------|-------------|-------------|----------|------------------|---------------|---------------|-----------|----------------|-------|
| peak_1  | chr21    | 26932550   | 26945254    | 26957959  | NA         | NA         | NA        | NA          | NA          | NA       | NA               | NA            | NA            | NA        | NA             | 0     |
| peak_1  | chr21    | 26932550   | 26945254    | 26957959  | NA         | NA         | NA        | NA          | NA          | NA       | NA               | NA            | NA            | NA        | NA             | 1     |
| peak_1  | chr21    | 26932550   | 26945254    | 26957959  | NA         | NA         | NA        | NA          | NA          | NA       | NA               | NA            | NA            | NA        | NA             | 2     |
| peak_16 | chr1     | 149856066  | 149858333   | 149860600 | gene       | 149856010  | 149858232 | -           | start       | 101      | overlapStart     | 0.48          | 0.98          | HIST2H2BE | protein_coding | 0     |
| peak_16 | chr1     | 149856066  | 149858333   | 149860600 | gene       | 149859440  | 149872351 | +           | start       | 1107     | overlapStart     | 0.26          | 0.09          | BOLA1     | protein_coding | 1     |
| peak_16 | chr1     | 149856066  | 149858333   | 149860600 | transcript | 149856010  | 149858232 | -           | start       | 101      | overlapStart     | 0.48          | 0.98          | HIST2H2BE | protein_coding | 2     |

Additional Table 3: Besthits output of UROPA annotation with config file as described above. Best hit for each query for each peak is given (see column query).

| peak_id | peak_chr | peak_start | peak_center | peak_end  | feature         | feat_start                    | feat_end                      | feat_strand | feat_anchor       | distance     | genomic_location                       | feat_ovl_peak  | peak_ovl_feat  | gene_name                 | gene_type                                    | query |
|---------|----------|------------|-------------|-----------|-----------------|-------------------------------|-------------------------------|-------------|-------------------|--------------|----------------------------------------|----------------|----------------|---------------------------|----------------------------------------------|-------|
| peak_1  | chr21    | 26932550   | 26945254    | 26957959  | NA,NA,NA        | NA,NA,NA                      | NA,NA,NA                      | NA,NA,NA    | NA,NA,NA          | NA,NA,NA     | NA,NA,NA                               | NA,NA,NA       | NA,NA,NA       | NA,NA,NA                  | NA,NA,NA                                     | 0,1,2 |
| peak_16 | chr1     | 149856066  | 149858333   | 149860600 | gene,transcript | 149856010,149859440,149856010 | 149858232,149872351,149858232 | -,+,-       | start,start,start | 101,1107,101 | overlapStart,overlapStart,overlapStart | 0.48,0.26,0.48 | 0.98,0.09,0.98 | HIST2H2BE,BOLA1,HIST2H2BE | protein_coding,protein_coding,protein_coding | 0,1,2 |

Additional Table 4: Besthits\_compact output of UROPA annotation with config file as described above. This file will be generated if multiple queries are defined and the "-r" parameter is added in the command line call. Best hits per query are combined to one row per peak.

# UROPA summary

## Input:

| query   | feature    | distance | feature.anchor | internals | strand | direction     | filter.attribute | attribute.value | show.attributes             |
|---------|------------|----------|----------------|-----------|--------|---------------|------------------|-----------------|-----------------------------|
| query00 | gene       | 5000     | start          | True      | ignore | any_direction | gene_type        | protein_coding  | c("gene_name", "gene_type") |
| query01 | gene       | 5000     | start          | False     | ignore | upstream      | gene_type        | protein_coding  | None                        |
| query02 | transcript | 1000     | start          | False     | ignore | any_direction | None             | None            | None                        |

| config_key | specification              |
|------------|----------------------------|
| priority:  | False                      |
| bed:       | ENCF001VFA.peaks.bed       |
| gtf:       | gencode.v19.annotation.gtf |

## Results:

| query   | peaks | peaks_with_annotation |
|---------|-------|-----------------------|
| query00 | 14989 | 4050                  |
| query02 | 14989 | 7198                  |

UROPA annotated 11248 peaks.  
Not all queries represent final hits!

## 1. Distances of annotated peaks in finalhits:

The following density plot displays the distance of annotated peaks to its feature(s) based on the finalhits.

### Additional Info:

This is independent of the number of queries, all features present in the finalhits are displayed.

### Note on output files:

**allhits:** All candidate features resulting from any query  
(1 peak : x queries : y annotations)

**besthits:** All candidate features resulting from any query  
(1 peak : x queries : 1 annotation)

**finalhits:** Only the one best feature among all queries  
(1 peak : 1 query : 1 annotation)

Distance to features across finalhits

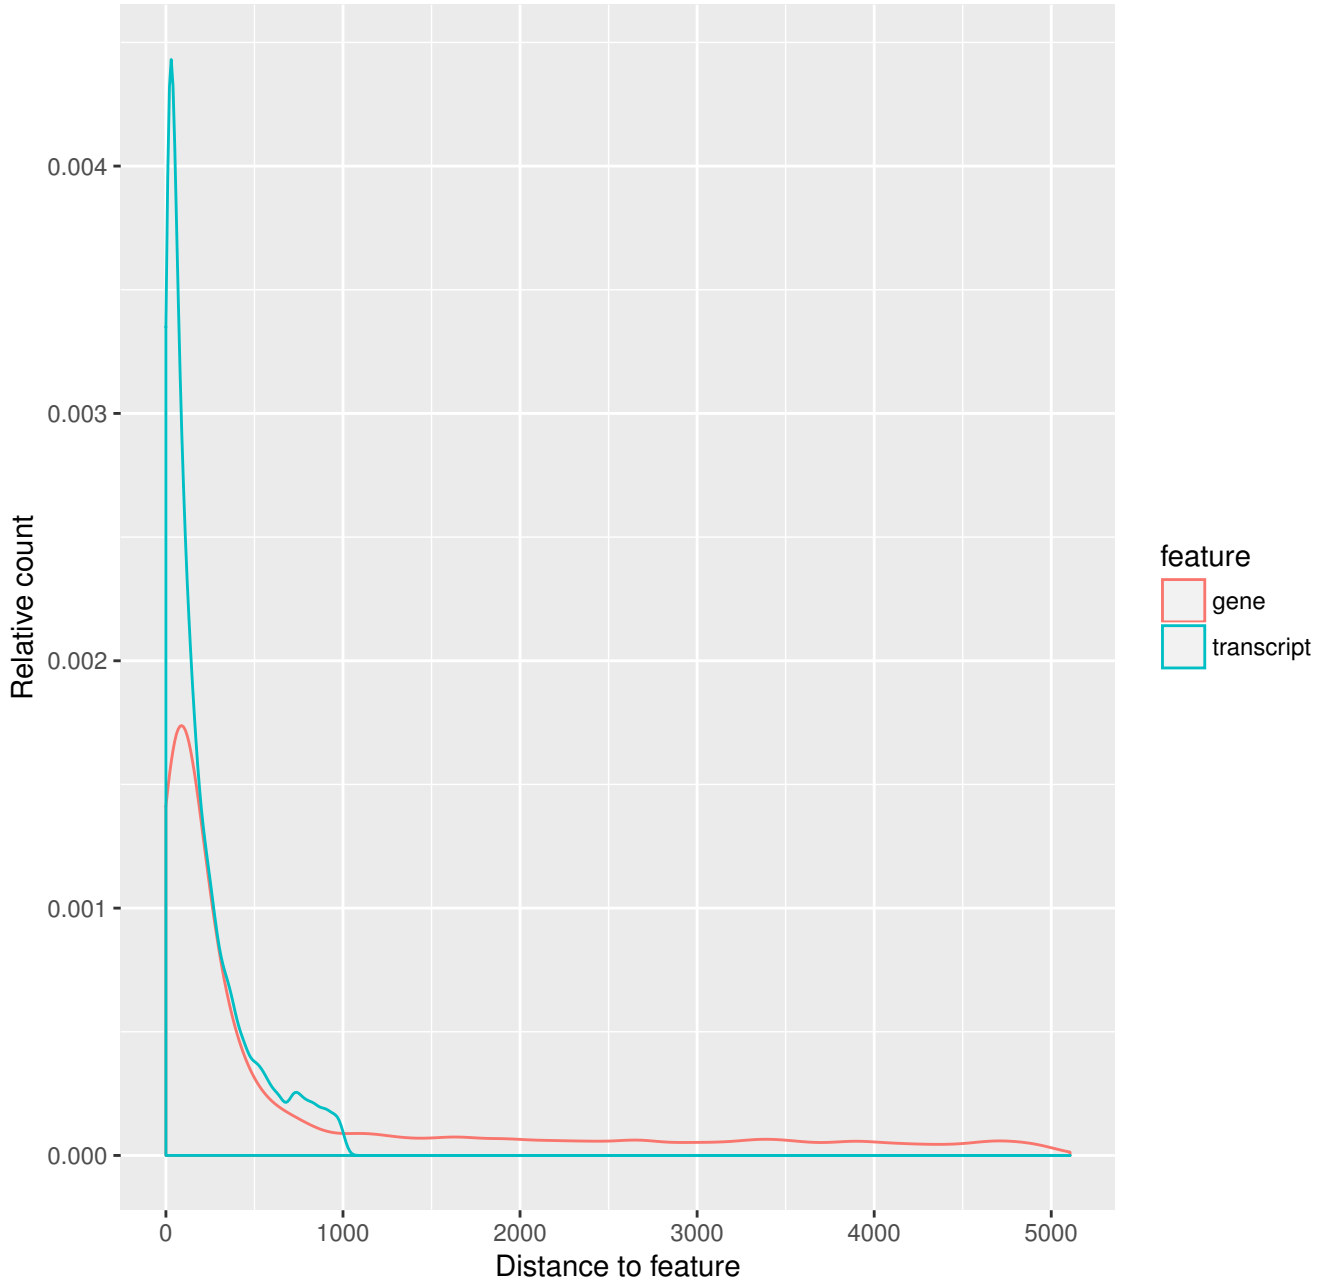

## 2. Relative locations of annotated peaks to features in finalhits:

The following pie chart(s) illustrate the relative location of the peaks in relation to the respective annotated feature as represented in the finalhits. The best feature found among all of the queries is used for this plot.

### Additional Info:

This is independent of the number of queries, all represented features of the finalhits are displayed.

### Genomic location of 'gene' across finalhits

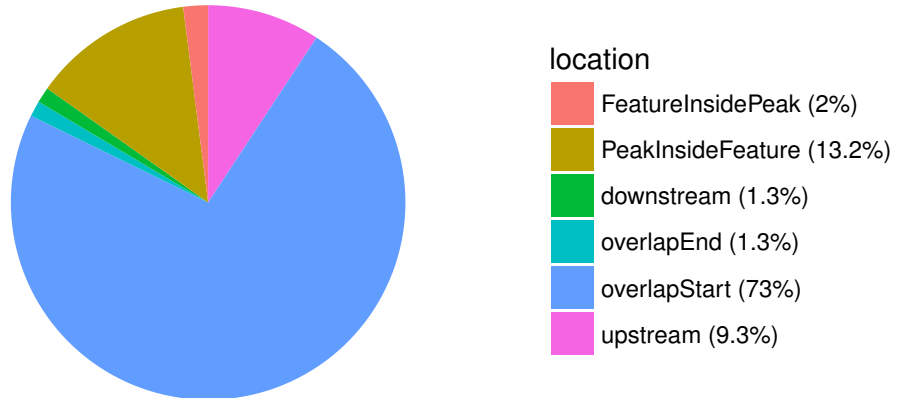

### Genomic location of 'transcript' across finalhits

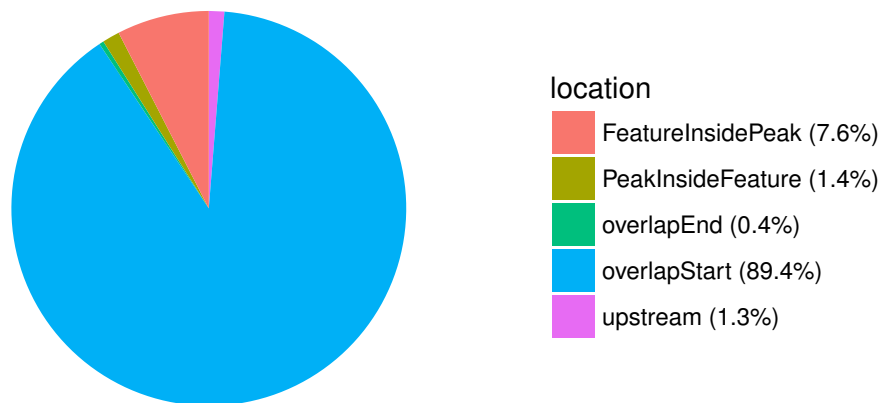



### 3. Allocation of available features in finalhits:

Bar plot displaying the occurrence of the different features if there is more than one feature assigned for peak annotation based on the finalhits. The best annotation found among all of the queries is used for this plot.

#### Additional Info:

This is independent of the number of queries;  
all features present in the finalhits are displayed.

If only one feature is present, this plot will be skipped.

## Feature distribution across finalhits

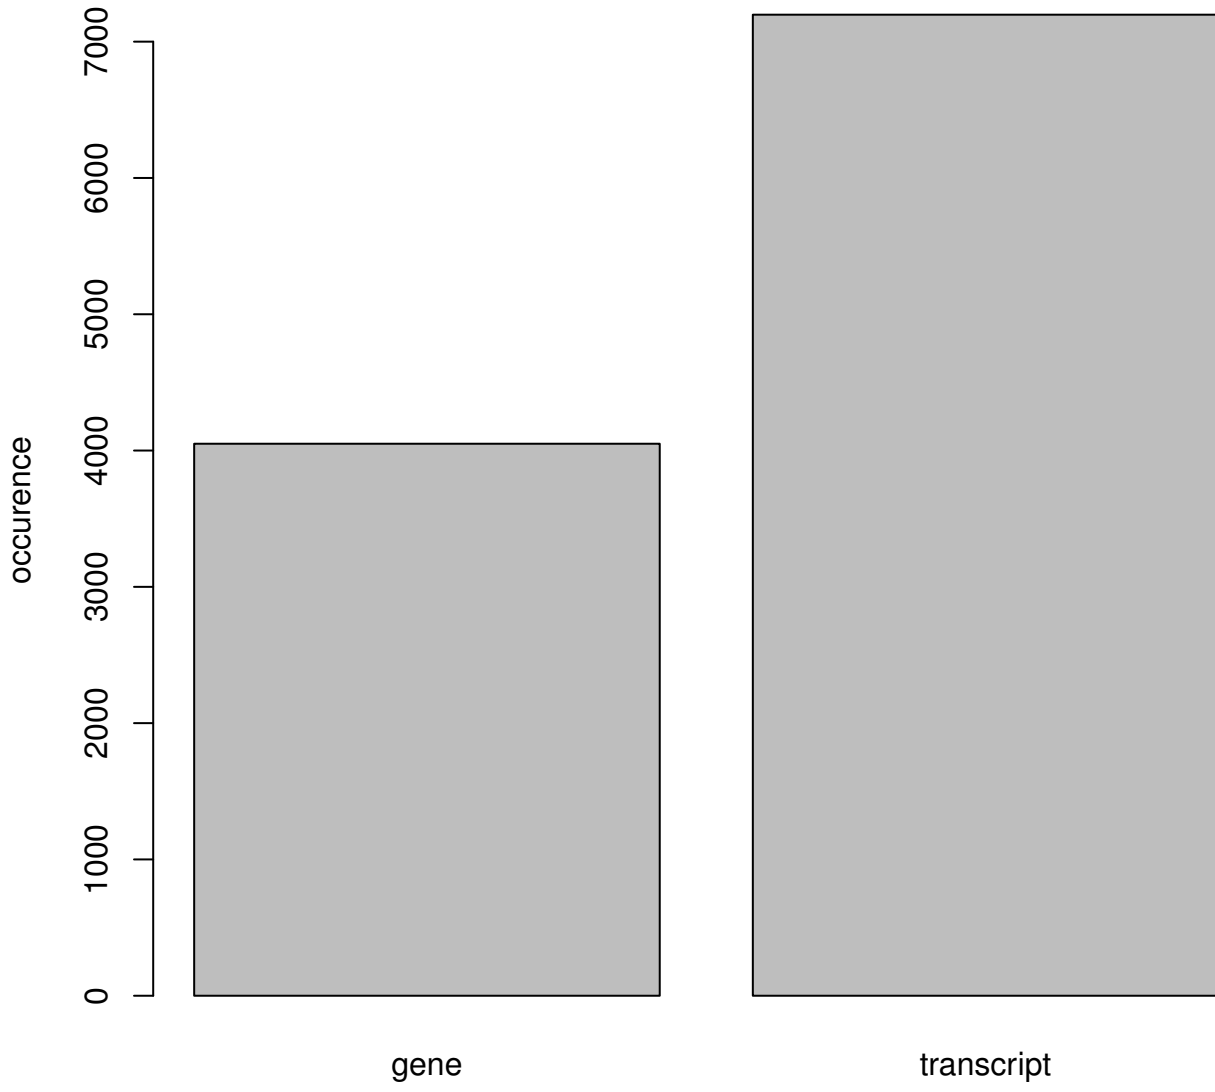

4. Distances of annotated peaks separated for features and queries in besthits:

The distribution of the distances per feature per query is displayed in histograms based on the besthits.

Additional Info:

This is dependent on the number of queries;  
all features present in any query are displayed.

Distance of query vs. feature across besthits Hits

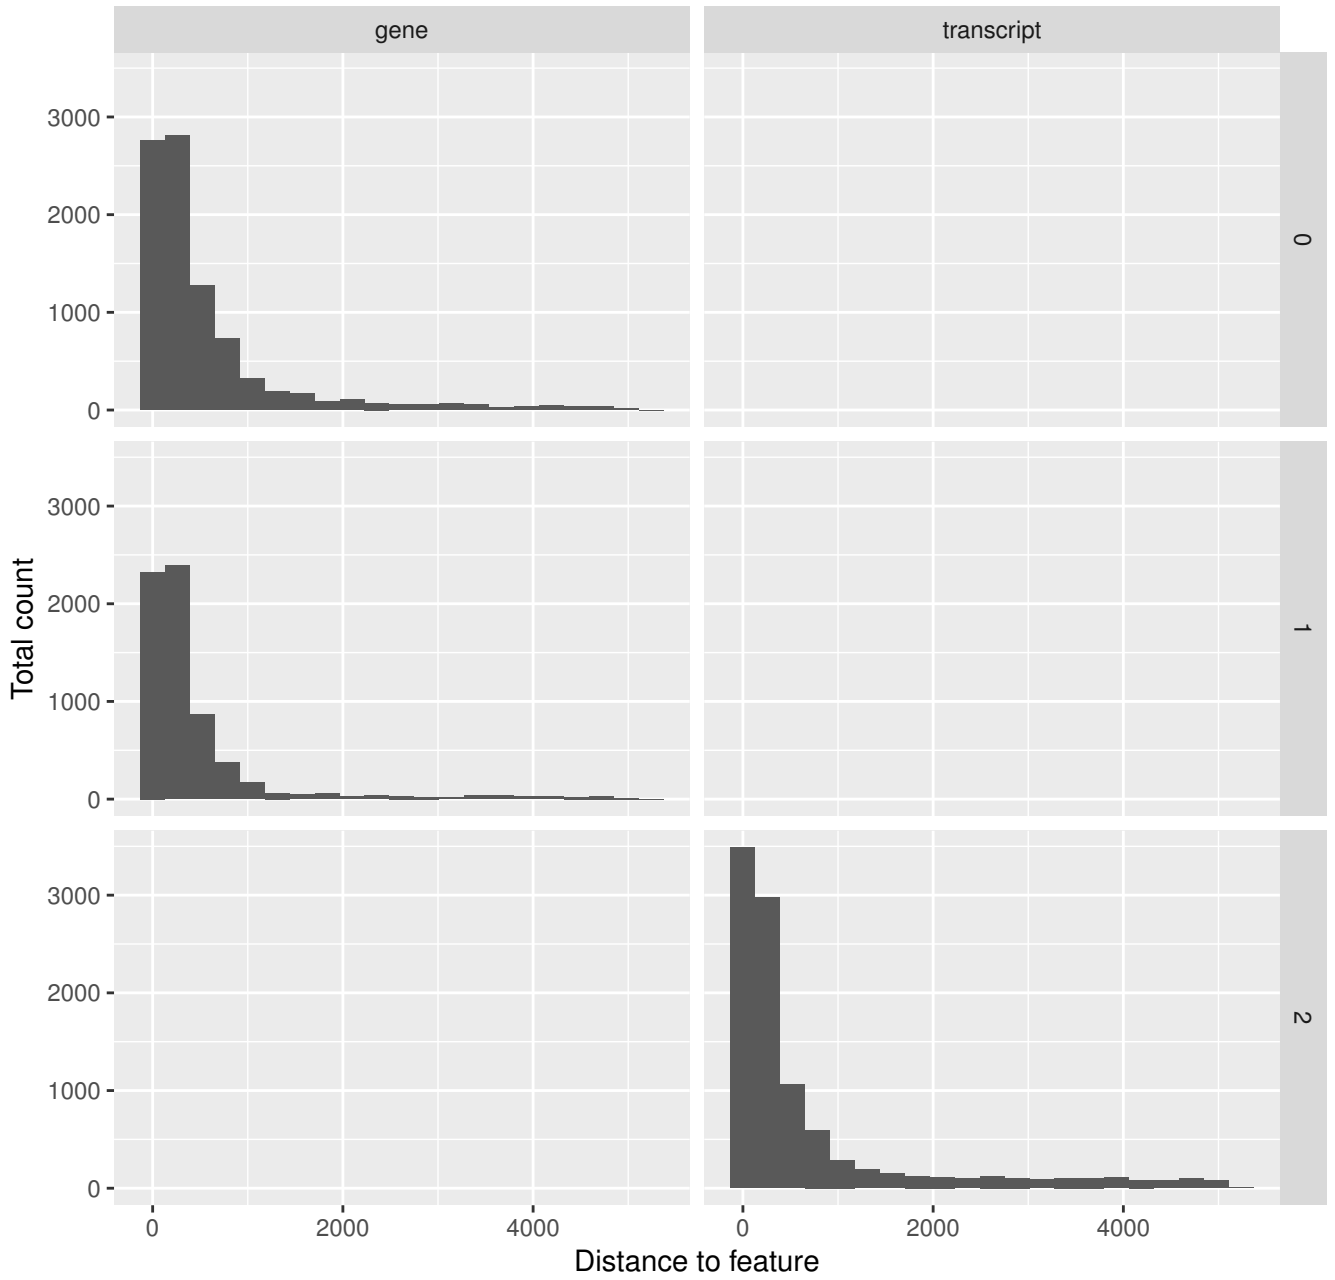

## 5. Relative locations of annotated peaks in besthits:

The following pie chart(s) illustrate the relative location of the peaks in relation to the respective annotated feature as represented in the besthits.

Additional Info:

This is dependent on the number of queries;  
all features present in the besthits are displayed.

**Genomic location of 'gene' across besthits Hits**

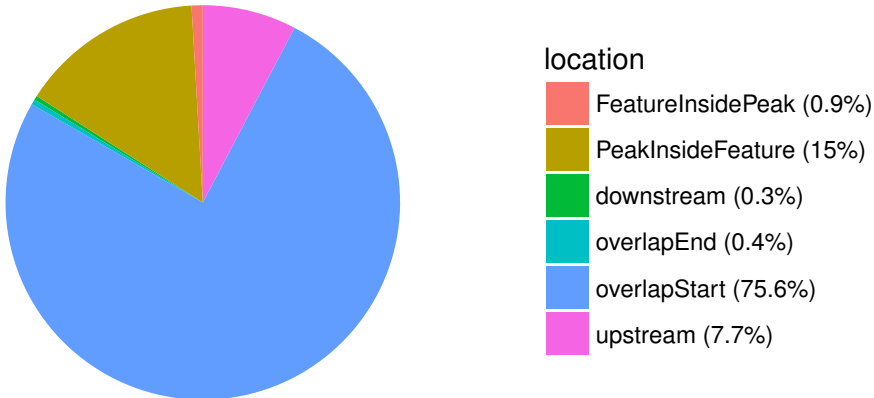

**Genomic location of 'transcript' across besthits Hits**

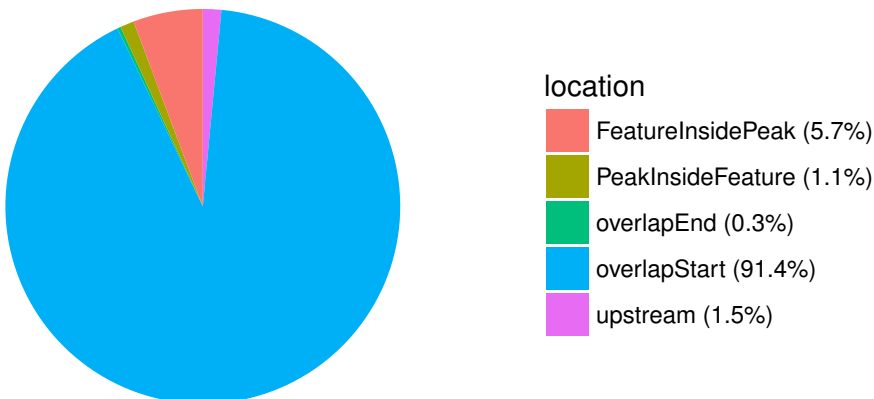

## 6. Allocation of available features in besthits:

Bar plot displaying the occurrence of the different features if there is more than one feature assigned for peak annotation based on the besthits. The best annotation found in each query is used for this plot

### Additional Info:

This is independent of the number of queries, all features present in the besthits are displayed.

If only one feature is present, this plot will be skipped.

### Feature distribution across besthits Hits

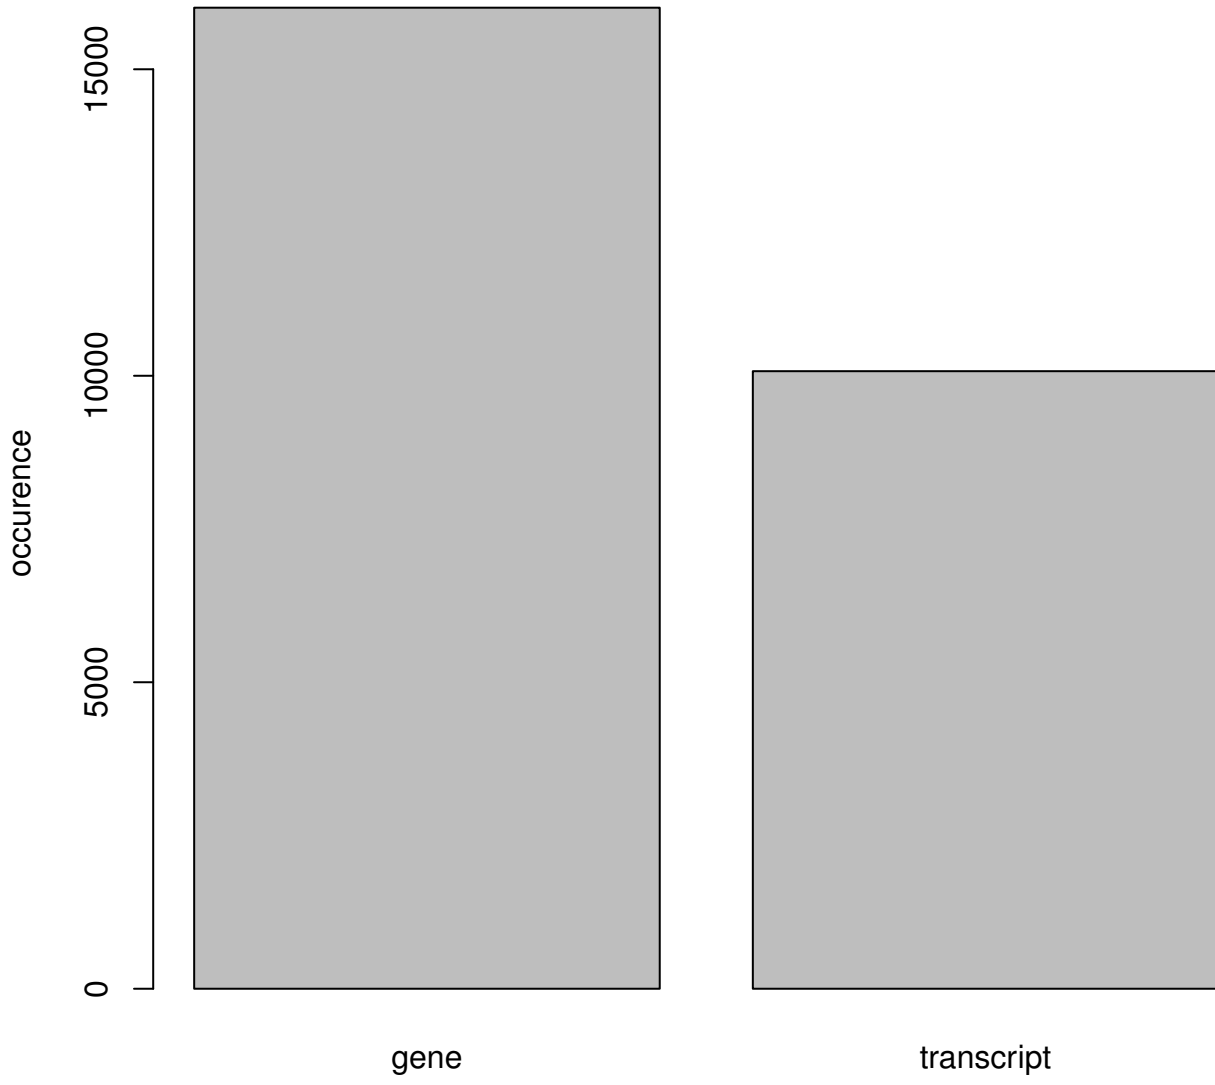



## 7: Pairwise comparisons of query annotations:

The following venn diagrams display peak based pairwise comparisons among all queries based on the besthits.

### Additional Info:

If only one query is present,  
this plot will be skipped.

Peak based pairwise compare of query00 and query02

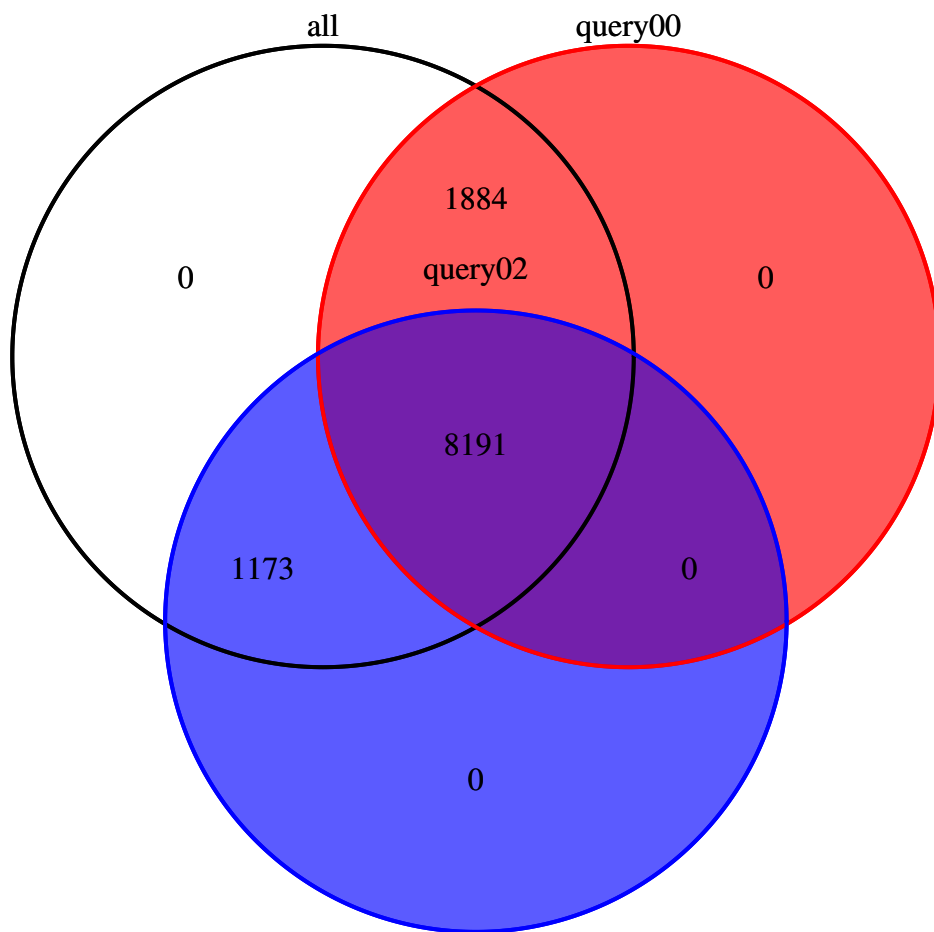

Peak based pairwise compare of query00 and query01

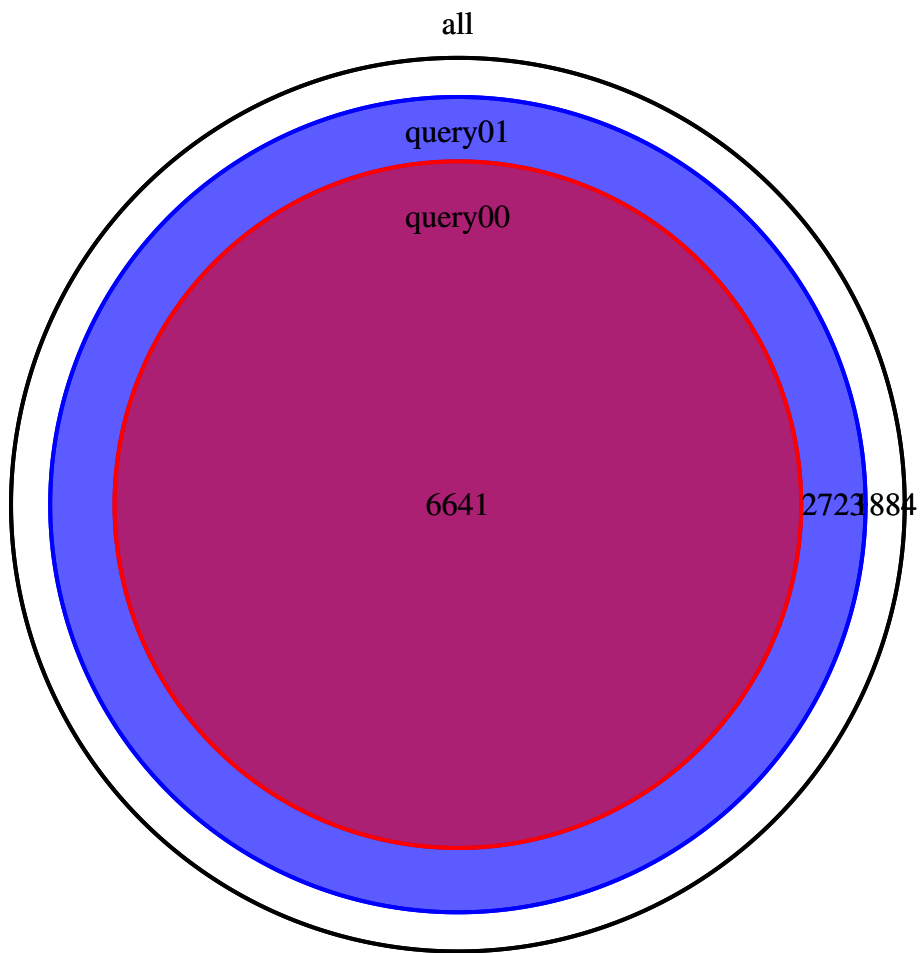

Peak based pairwise compare of query01 and query02

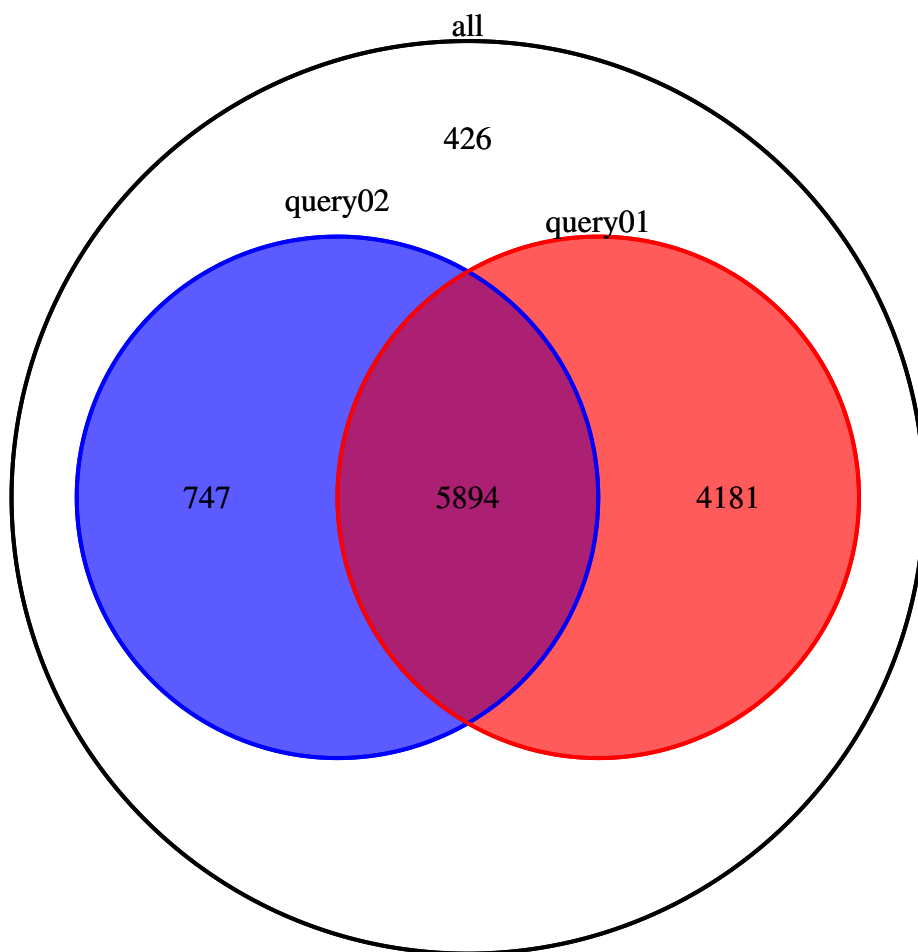

8: Comparison of all specified queries:

The following Chow Ruskey plot compares all queries based on the besthits.

It represents an area-proportional Venn diagram, revealing the distribution of peaks that could be annotated per query and works for up to 5 queries.

Additional Info:

It is evaluated whether peaks are annotated, but not whether they are annotated for the same feature

Chow Ruskey comparison of all peaks annotated with UROPA

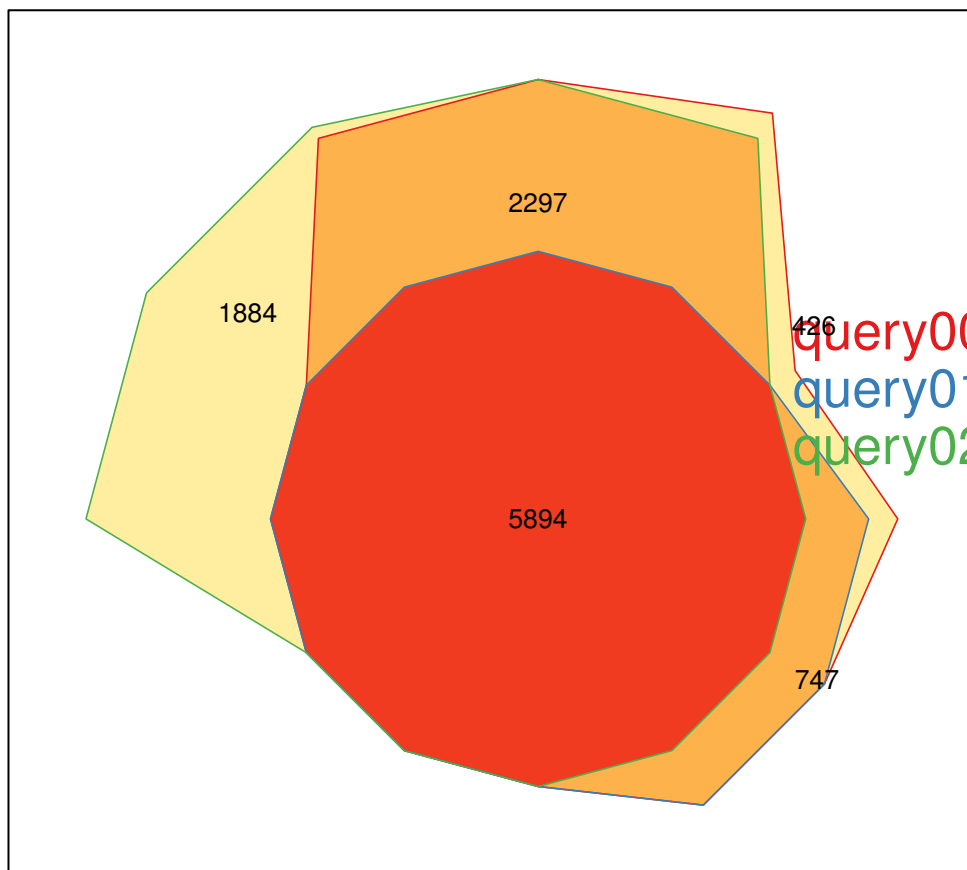

Additional File 2: Detailed comparison of UROPA and Goldmine with respect to distance.

## Comparison of UROPA and Goldmine

UROPA Config:

```
{"queries":[{"feature":"gene","show.attributes":"gene_name","internals":"T","distance":100000}],
"gtf": " gencode.v19.annotation.gtf","bed": "ENCF001VFA.bed"}
```

- Goldmine annotated 8 peaks more than UROPA (due to default distance, can be changed for UROPA)
- 7 peaks were annotated to different genes:

| peak_id    | chr   | start     | end       | gm_location | gm_annotation | gm_distance | u_annotation  | u_distance | u_location   |
|------------|-------|-----------|-----------|-------------|---------------|-------------|---------------|------------|--------------|
| peak_6230  | chr15 | 62681868  | 62683020  | intergenic  | RP11-299H22.7 | 104662      | TLN2          | 281        | overlapStart |
| peak_10455 | chr9  | 68726022  | 68726702  | intergenic  | CR786580.1    | 212834      | RP11-391M20.1 | 267        | overlapStart |
| peak_14776 | chr5  | 111859512 | 111860357 | intergenic  | EPB41L4A-AS2  | 103201      | RP11-159K7.1  | 22736      | upstream     |
| peak_14465 | chr3  | 104240092 | 104242737 | intergenic  | AC016970.1    | 466451      | RP11-281P11.1 | 19304      | downstream   |
| peak_3911  | chr3  | 105974260 | 105977219 | intergenic  | Y_RNA         | 257524      | RP11-93B21.1  | 68844      | downstream   |
| peak_14030 | chrX  | 42801365  | 42803671  | intergenic  | RP3-326I13.1  | 232571      | RP11-265D20.1 | 56905      | upstream     |
| peak_13485 | chr2  | 62589854  | 62590700  | intergenic  | snoU13        | 97620       | RP11-642D6.1  | 12403      | upstream     |

- peak\_6230 overlaps the start position of TLN2, but is annotated as intergenic with a distance of more than 100.000 by goldmine
- other annotated genes were not present in the online gencode version used by UROPA



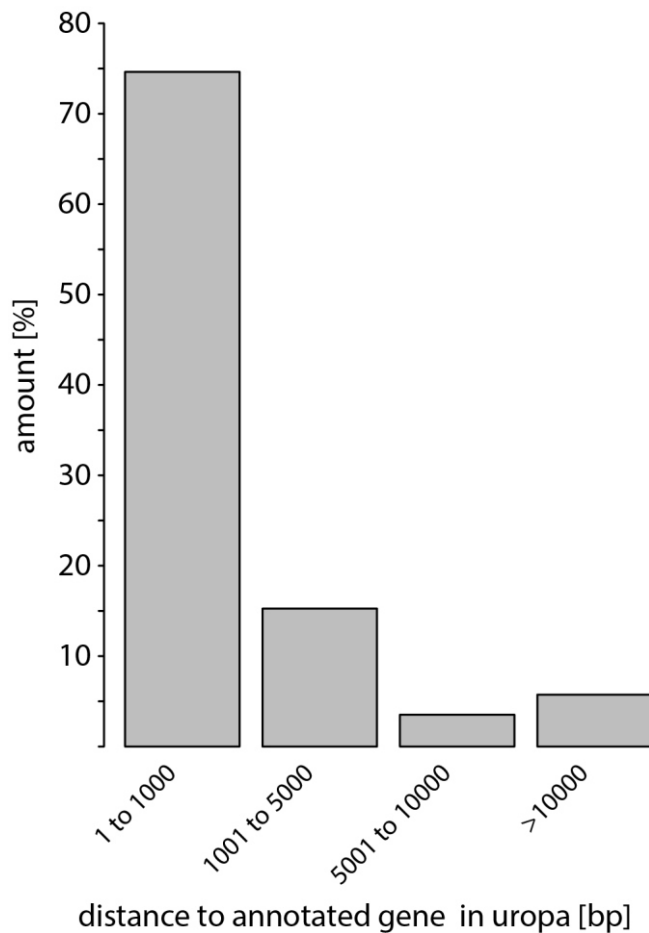

Comparison of peaks, called as promoters with a distance of 0 in goldmine, and respective distance in UROPA: In total, 10.559 peaks are called as promoters in goldmine, with same gene annotation in UROPA. Of these, UROPA reports

- 7881 with distance smaller 1000
- 1611 with distance 1000 to 5000
- 371 with distance 5000 to 10000
- 606 with distances above 10000 (more than 1% further than 50.000 bp off)

Examples:

- peak\_11600      chr21   36419908 – 36421819
  - Goldmine: distance 0 in promoter of RUNX1
  - UROPA: peak inside feature, distance of 260.766 to feature
- peak\_13322      chr8    99837692 - 99838615
  - Goldmine: distance 0 in promoter of STK3
  - UROPA: peak inside feature, distance of 116.902 to feature start

Additional File 3: Comparison of ChipPeakAnno and UROPA with *internals* parameter set to TRUE; activating the *additional* parameter for UROPA generates a smaller number of ChipPeakAnno specific peaks, indicating that a large number of these are located outside the desired distance range.

# ChIPpeakAnno

internals:True

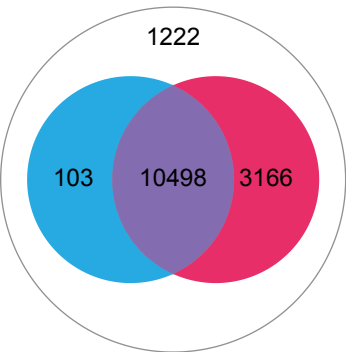

○ POLR2A ChIP-seq peaks

● specific for reference tool

● specific for UROPA

● common annotation

Additional File 4: Annotation statistics on a complex use case example deriving from colocalization of transcription factor binding sites (TFBS; peaks) with gene promoters (reference GTF) and ATAC-seq peaks (chromatin state open). The table represents the percentage of locations in cluster 1 (open chromatin) and 2 (closed chromatin) for four TFs respectively, defined by six different queries. Each query represents a different definition of a promoter region. Resulting numbers indicate that open locations (cluster 1) are located in close proximity to a gene (query 0-4), while closed locations (cluster 2) are depleted for proximity of coding genes.

| query | feature - filter attribute | anchor | distance | Gabpa     |           | Fli1      |           | Klf1      |           | Pax7      |           |
|-------|----------------------------|--------|----------|-----------|-----------|-----------|-----------|-----------|-----------|-----------|-----------|
|       |                            |        |          | cluster 1 | cluster 2 | cluster 1 | cluster 2 | cluster 1 | cluster 2 | cluster 1 | cluster 2 |
| 0     | gene - protein coding      | start  | 1000:500 | 85.5      | 4.21      | 88.11     | 3.41      | 84.42     | 2.52      | 30.71     | 1.06      |
| 1     | gene - protein coding      | start  | 2000:500 | 87.22     | 6.18      | 90.15     | 5.12      | 87.09     | 4.5       | 37.95     | 2.58      |
| 2     | gene - protein coding      | start  | 3000:500 | 88.2      | 7.87      | 90.83     | 6.72      | 88.21     | 6.39      | 40.68     | 4.09      |
| 3     | gene - protein coding      | start  | 5000:500 | 89.43     | 11.31     | 91.68     | 9.6       | 89.05     | 9.9       | 44.97     | 6.99      |
| 4     | gene - pseudogene          | start  | 5000:500 | 1.39      | 1.5       | 0.51      | 1.35      | 2.53      | 1.36      | 1.02      | 1.32      |
| 5     | gene - protein coding      | start  | 100000   | 99.51     | 77.6      | 100       | 73.25     | 99.86     | 77.73     | 95.66     | 73.14     |

all TF specific numbers in % of respective group, cluster 1 means open chromatin location, cluster 2 means closed chromatin location

Additional File 5: Runtime analysis with multiprocessing parameter; a large number of peaks (135k) and a complex configuration file was used multiple times with an increasing number of parallel threads (x axis) and runtime was recorded (y axis). The acceleration increases nearly linearly with the number of threads.

## H3K4me1 peaks

(ENCODE accession: ENCFF001SUE; #peaks: 134,589)

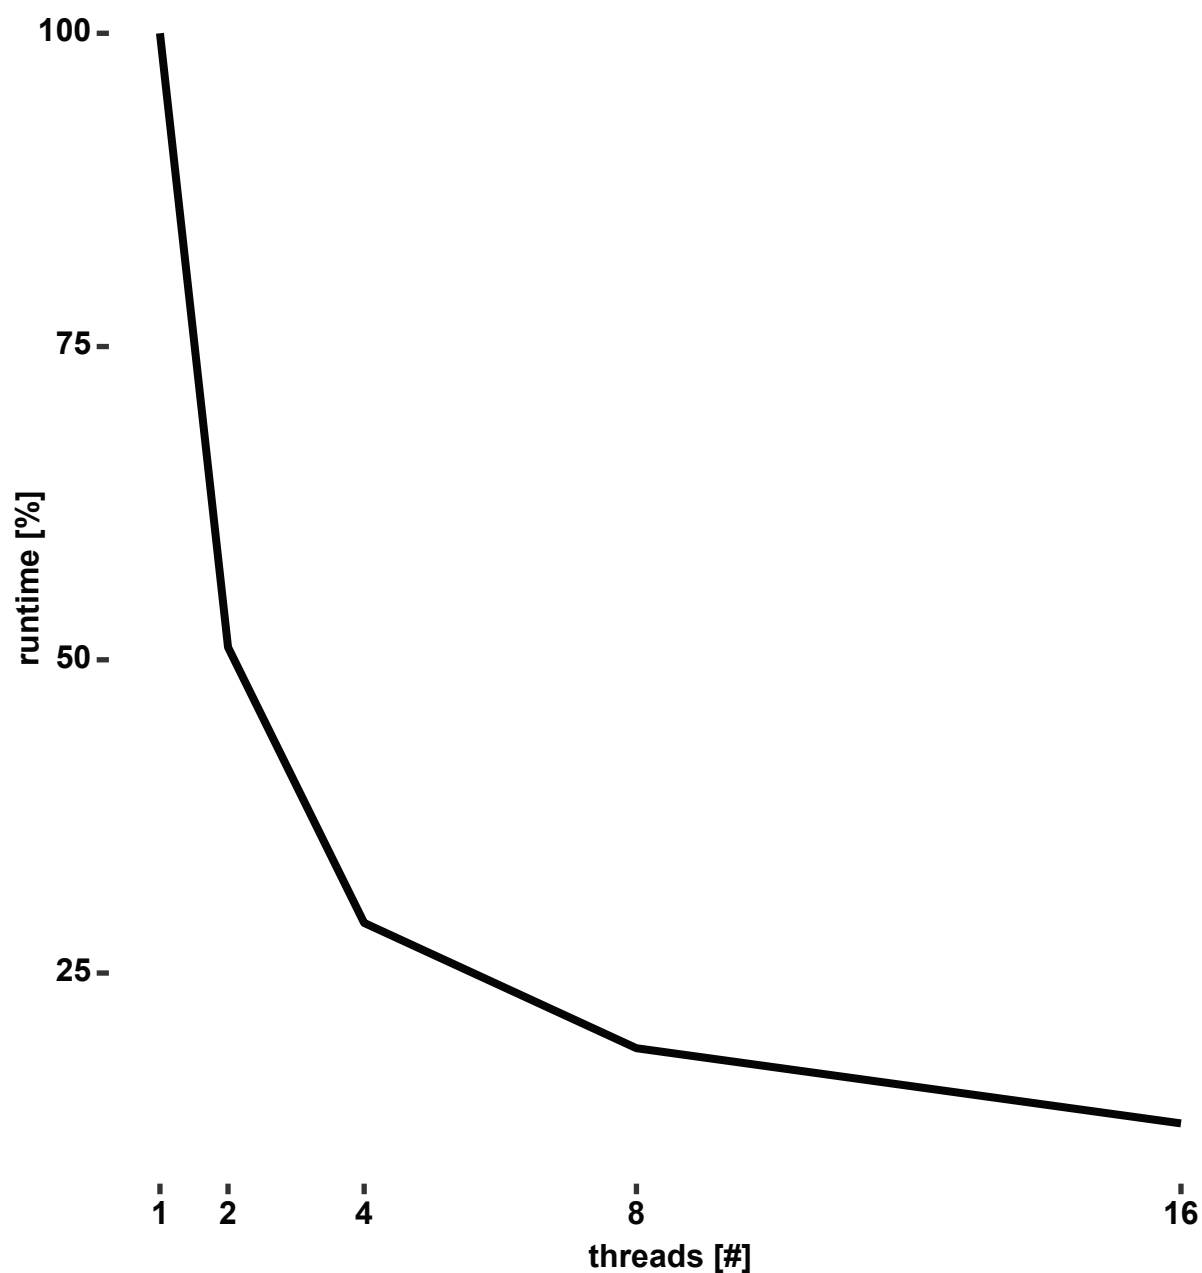

```
{
  "queries":[
    {"feature":"gene", "distance":[5000,2000], "feature.anchor":"start", "filter.attribute":"gene_type",
      "attribute.value":"protein_coding";show.attributes:["gene_name";"gene_type"]},
    {"feature":"gene", "distance":10000, "feature.anchor":"start", "direction":"upstream",
      "filter.attribute":"gene_type", "attribute.value":"protein_coding"},
    {"feature":"gene", "distance":1000, "internals":"True", "filter.attribute":"gene_type",
      "attribute.value":"protein_coding"},
    {"feature":"gene", "internals":"True", "filter.attribute":"gene_type",
      "attribute.value":"protein_coding"}
  ],
  "priority": "T",
  "gtf": "gencode.v19.annotation.gtf",
  "bed": "ENCFF001SUE.bed"
}
```

Additional File 6: Influence of feature.anchor key with respect to gene assignment; UROPA was run twice with different configuration files for the same set of peaks deriving from histone modification H3K36me3. Resulting peak – gene annotations are visualized as a venn diagram. Approximately 25% of peaks were assigned to a different gene, driven by the feature.anchor effect.



# H3K36me3: TSS vs. body

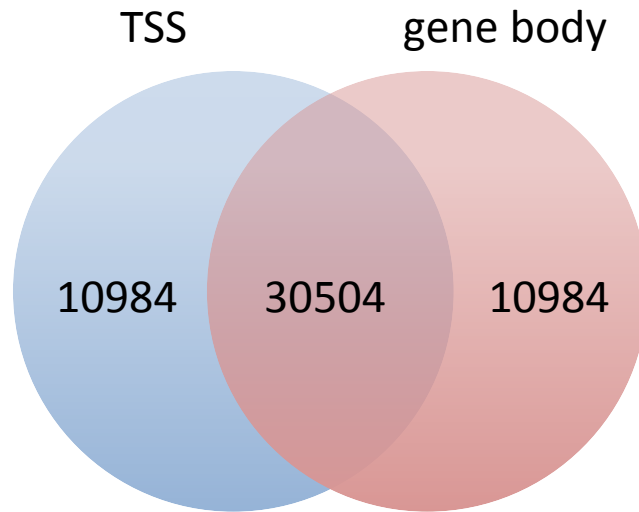

- GEO Sample GSM733733
- Human adult dermal fibroblasts
- H3K36me3
- 41488 peaks
- UROPA using either TSS or the gene body as anchor for annotation
- ~25% of peaks are annotated with a different gene

## UROPA config: TSS

```
{
  "queries":[
    {"feature":"gene","distance":100000,"show.attributes":["gene_id","gene_name","gene_type"],"feature.anchor":["start"]}
  ],
  "priority":"F",
  "gtf":"/mnt/flatfiles/organisms/human/hg19_GRCh37/annotation/gencode/gencode.v25lift37.annotation_nochr.gtf",
  "bed": "./GSM733733_hg19_wgEncodeBroadHistoneNhdfadH3k36me3StdPk.broadPeak_sorted.bed"
}
```

## UROPA config: gene body

```
{
  "queries":[
    {"feature":"gene","distance":100000,"show.attributes":["gene_id","gene_name","gene_type"],"feature.anchor":["center"]}
  ],
  "priority":"F",
  "gtf":"/mnt/flatfiles/organisms/human/hg19_GRCh37/annotation/gencode/gencode.v25lift37.annotation_nochr.gtf",
  "bed": "./GSM733733_hg19_wgEncodeBroadHistoneNhdfadH3k36me3StdPk.broadPeak_sorted.bed"
}
```
